# Supplementary material for: Predictors and prognosis of elderly hip fracture patients with perioperative atrial fibrillation: a nested case–control study
Source: PubMed Central journal article supplement — BMC Geriatr. 2025 Jan 3;25:4. doi: 10.1186/s12877-024-05647-1 (PMC11697886; doi:10.1186/s12877-024-05647-1), 2025-01-03
Supplement: 12877_2024_5647_MOESM1_ESM.pdf [file 12877_2024_5647_MOESM1_ESM.pdf]

**STable 1 Baseline characteristics of geriatric patients with hip fracture**

|                                | Total<br>(n=1376) | NAF<br>(n=1189)   | AF<br>(n=187)     | F/t/z             | P 值    | P1      | P2      | P3      |       |
|--------------------------------|-------------------|-------------------|-------------------|-------------------|--------|---------|---------|---------|-------|
|                                |                   |                   | Par AF<br>(n=103) | Per AF<br>(n=84)  |        |         |         |         |       |
| Age, mean $\pm$ SD<br>(years)  | 79.51 $\pm$ 7.346 | 79.29 $\pm$ 7.419 | 82.17 $\pm$ 6.790 | 79.44 $\pm$ 6.335 | 7.388  | 0.001   | < 0.001 | 0.851   | 0.011 |
| Age group, n (%)               |                   |                   |                   |                   |        |         |         |         |       |
| < 75 years                     | 379 (27.5%)       | 344 (28.9%)       | 17 (16.5%)        | 18 (21.4%)        | 9.011  | 0.011   | 0.007   | 0.136   | 0.453 |
| $\geq$ 75 years                | 997 (72.5%)       | 845 (71.1%)       | 86 (83.5%)        | 66 (78.6%)        |        |         |         |         |       |
| ACCI (IQR)                     | 5 (4-5)           | 5 (4-5)           | 6 (4-6)           | 5 (4-6)           | 32.795 | < 0.001 | < 0.001 | < 0.001 | 0.058 |
| Gender, n (%)                  |                   |                   |                   |                   |        |         |         |         |       |
| Male                           | 408 (29.7%)       | 348 (29.3%)       | 36 (35.0%)        | 24 (28.6%)        | 1.518  | 0.468   | 0.226   | 0.893   | 0.342 |
| Female                         | 968 (70.3%)       | 841 (70.7%)       | 67 (65.0%)        | 60 (71.4%)        |        |         |         |         |       |
| Fracture types, n (%)          |                   |                   |                   |                   |        |         |         |         |       |
| Femoral neck<br>fractures      | 648 (47.1%)       | 556 (46.8%)       | 58 (56.3%)        | 34 (40.5%)        | 5.041  | 0.080   | 0.063   | 0.265   | 0.031 |
| Intertrochanteric<br>fractures | 728 (52.9%)       | 633 (53.2%)       | 45 (43.7%)        | 50 (59.5%)        |        |         |         |         |       |
| Comorbidities, n (%)           |                   |                   |                   |                   |        |         |         |         |       |
| Hypertension                   | 664 (48.3%)       | 538 (45.2%)       | 69 (67.0%)        | 57 (67.9%)        | 31.711 | < 0.001 | < 0.001 | < 0.001 | 0.905 |
| Stroke                         | 540 (39.2%)       | 446 (37.5%)       | 49 (47.6%)        | 45 (53.6%)        | 11.727 | 0.003   | 0.044   | 0.004   | 0.402 |
| Coronary heart<br>disease      | 368 (26.7%)       | 294 (24.7%)       | 47 (45.6%)        | 27 (32.1%)        | 22.474 | < 0.001 | < 0.001 | 0.135   | 0.037 |
| Diabetes                       | 300 (21.8%)       | 254 (21.4%)       | 18 (17.5%)        | 28 (33.3%)        | 7.817  | 0.020   | 0.359   | 0.010   | 0.009 |
| COPD                           | 47 (3.4%)         | 28 (2.4%)         | 15 (14.6%)        | 10 (11.9%)        | 53.813 | < 0.001 | < 0.001 | < 0.001 | 0.338 |
| Cancer                         | 62 (4.5%)         | 53 (4.5%)         | 5 (4.9%)          | 4 (4.8%)          | .048   | 0.976   | 0.852   | 0.897   | 0.976 |
| Surgical type, n (%)           |                   |                   |                   |                   |        |         |         |         |       |
| Replacement                    | 586 (42.6%)       | 503 (42.3%)       | 52 (50.5%)        | 31 (36.9%)        | 3.776  | 0.151   | 0.107   | 0.333   | 0.062 |
| Fixation                       | 790 (57.4%)       | 686 (57.7%)       | 51 (49.5%)        | 53 (63.1%)        |        |         |         |         |       |
| Anesthesia type, n (%)         |                   |                   |                   |                   |        |         |         |         |       |
| General                        | 792 (57.6%)       | 686 (57.7%)       | 57 (55.3%)        | 49 (58.3%)        | 0.237  | 0.888   | 0.643   | 0.909   | 0.681 |
| Lumbar                         | 584 (42.4%)       | 503 (42.3%)       | 46 (44.7%)        | 35 (41.7%)        |        |         |         |         |       |

Values are presented as mean  $\pm$  standard deviation, median (interquartile range), or number (percentage) as appropriate

SD Standard deviation, AF Atrial fibrillation, NAF Non atrial fibrillation, Par AF Paroxysmal atrial fibrillation, Per AF Permanent atrial fibrillation, COPD Chronic obstructive pulmonary disease, ACCI Age-Adjusted Charlson Comorbidity Index

P: Comparison among non atrial fibrillation, paroxysmal atrial fibrillation and permanent atrial fibrillation

P1: Non atrial fibrillation VS Paroxysmal atrial fibrillation, P2: Non atrial fibrillation VS Permanent atrial fibrillation, P3: Paroxysmal atrial fibrillation VS Permanent atrial fibrillation

STable 2 Comparison of the outcome of patients with non- atrial fibrillation paroxysmal atrial fibrillation and permanent atrial fibrillation in old patients with hip fracture

|                               | Total<br>(n=1376) | NAF<br>(n=1189) | AF (n=187)        |                  | F/t/z   | P 值    | P1     | P2     | P3     |
|-------------------------------|-------------------|-----------------|-------------------|------------------|---------|--------|--------|--------|--------|
|                               |                   |                 | Par AF<br>(n=103) | Per AF<br>(n=84) |         |        |        |        |        |
| Pulmonary infection           | 204 (14.8%)       | 162 (13.6%)     | 21 (20.4%)        | 21 (25.0%)       | 10.768  | 0.005  | 0.063  | 0.005  | 0.376  |
| Heart failure                 | 421 (30.6%)       | 329 (27.7%)     | 44 (42.7%)        | 48 (57.1%)       | 39.799  | <0.001 | 0.001  | <0.001 | 0.031  |
| Stress ulcer                  | 25 (1.8%)         | 9 (0.8%)        | 7 (6.8%)          | 9 (10.7%)        | 59.081  | <0.001 | <0.001 | <0.001 | 0.042  |
| Urinary tract infection       | 49 (3.6%)         | 33 (2.8%)       | 8 (7.8%)          | 8 (9.5%)         | 16.139  | <0.001 | 0.009  | 0.001  | 0.517  |
| Anemia                        | 648 (47.1%)       | 553 (46.5%)     | 51 (49.5%)        | 44 (52.4%)       | 1.348   | 0.510  | 0.558  | 0.298  | 0.696  |
| Stress hyperglycemia          | 52 (3.8%)         | 45 (3.8%)       | 3 (2.9%)          | 4 (4.8%)         | 0.436   | 0.804  | 0.657  | 0.650  | 0.510  |
| Acute cerebrovascular disease | 51 (3.7%)         | 16 (1.3%)       | 17 (16.5%)        | 18 (21.4%)       | 139.759 | <0.001 | <0.001 | <0.001 | 0.062  |
| Hyponatremia                  | 421 (30.6%)       | 359 (30.2%)     | 38 (36.9%)        | 24 (28.6%)       | 2.176   | 0.337  | 0.157  | 0.755  | 0.220  |
| Hypokalemia                   | 325 (23.6%)       | 261 (22.0%)     | 45 (43.7%)        | 19 (22.6%)       | 24.878  | <0.001 | <0.001 | 0.888  | 0.001  |
| Hypoalbuminemia               | 700 (50.9%)       | 606 (51.0%)     | 55 (53.4%)        | 39 (46.4%)       | 0.931   | 0.628  | 0.636  | 0.422  | 0.344  |
| Hospital stay (IQR), days     | 12 (10,16)        | 12 (10,16)      | 13 (10,17)        | 13 (11,17)       | 6.893   | 0.032  | 0.160  | 0.050  | 0.602  |
| All-cause mortality           | 141 (10.3%)       | 103 (8.7%)      | 13 (13.5%)        | 25 (29.8%)       | 38.980  | <0.001 | 0.125  | <0.001 | <0.001 |

Values are presented as mean  $\pm$  standard deviation, median (interquartile range), or number (percentage) as appropriate

AF Atrial fibrillation, NAF Non atrial fibrillation, Par AF Paroxysmal atrial fibrillation, Per AF Permanent atrial fibrillation

P1: Non atrial fibrillation VS Paroxysmal atrial fibrillation, P2: Non atrial fibrillation VS Permanent atrial fibrillation, P3: Paroxysmal atrial fibrillation VS Permanent atrial fibrillation
